# Supplementary material for: Tuning of scleroglucan adsorption on carbonate surfaces via grafting alkyl side chains of different lengths: a theoretical and experimental study
Source: Royal Society of Chemistry journal article supplement (doi:10.1039/d3sm00099k), 2023-01-01
Supplement: d3sm00099k1.pdf [file d3sm00099k1.pdf]

## Supporting information

# Tuning of Scleroglucan Adsorption on Carbonate Surfaces via Grafting Alkyl Side Chains of Different Lengths: A Theoretical and Experimental Study

**Abbas Shirdast<sup>1</sup>, Behnam Davoodi<sup>1</sup>, Jamal Aalaie<sup>2</sup>, Pengfei Zhang<sup>3</sup>  
and Alireza Sharif<sup>1\*</sup>**

1. Department of Polymer Reaction Engineering, Faculty of Chemical Engineering, Tarbiat Modares University, 14155/143, Tehran, Iran,
2. Chemicals, Polymers & Petrochemicals Technology Development Division, Research Institute of Petroleum Industry (RIPI), 14665-137, Tehran, Iran
3. State Key Laboratory for Modification of Chemical Fibers and Polymer Materials, Center for Advanced Low-Dimension Materials, College of Material Science and Engineering, Donghua University, Shanghai 201620, China

\*Corresponding Author's E-mail: [asharif@modares.ac.ir](mailto:asharif@modares.ac.ir)

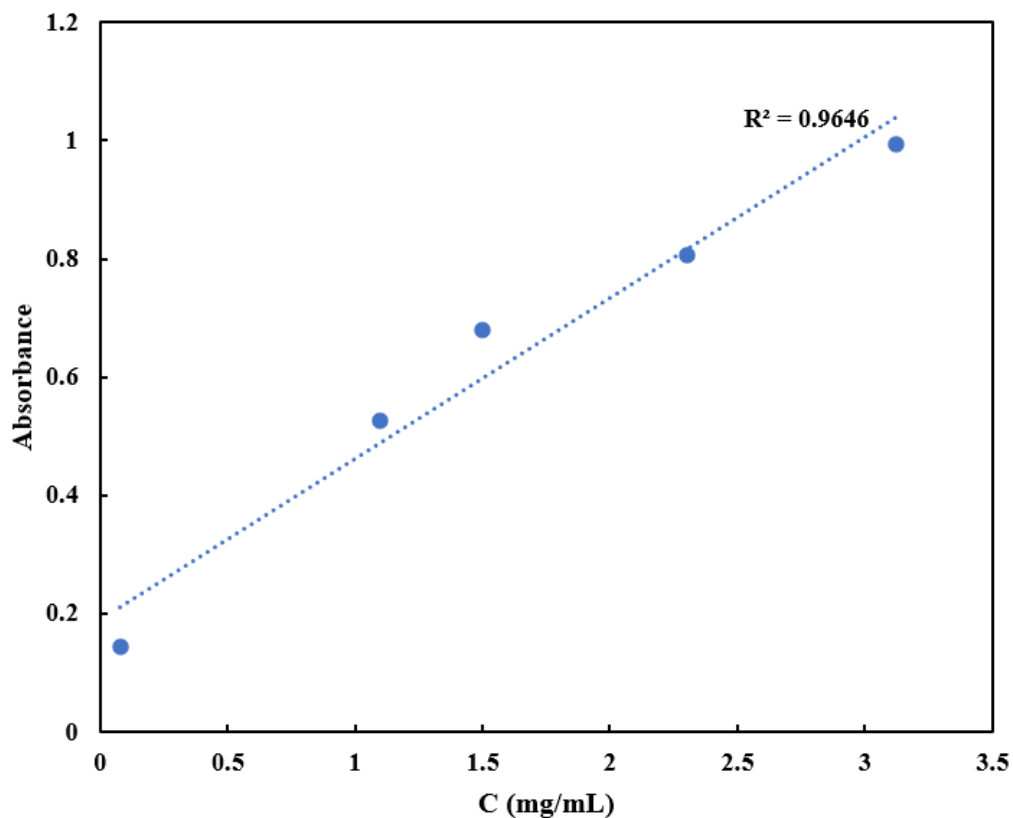

**Fig S1.** Calibration curve for UV-vis spectrophotometric determination of ScIlg concentration in aqueous solution.

**Table S1.** The Hansen solubility parameters for the components in the solutions [1]

| Component                                      | $\delta_D$ (MPa) <sup>1/2</sup> | $\delta_P$ (MPa) <sup>1/2</sup> | $\delta_H$ (MPa) <sup>1/2</sup> |
|------------------------------------------------|---------------------------------|---------------------------------|---------------------------------|
| Water                                          | 15.0                            | 16.0                            | 42.3                            |
| ScIlg main chain segment                       | 18.2                            | 12.4                            | 10.8                            |
| Side chain segment                             | 16.0                            | 0.8                             | 2.8                             |
| Carbonate solid surface                        | 19.4                            | 7.5                             | 6.7                             |
| NaCl salt (Na <sup>+</sup> , Cl <sup>-</sup> ) | 17.3                            | 10.0                            | -                               |

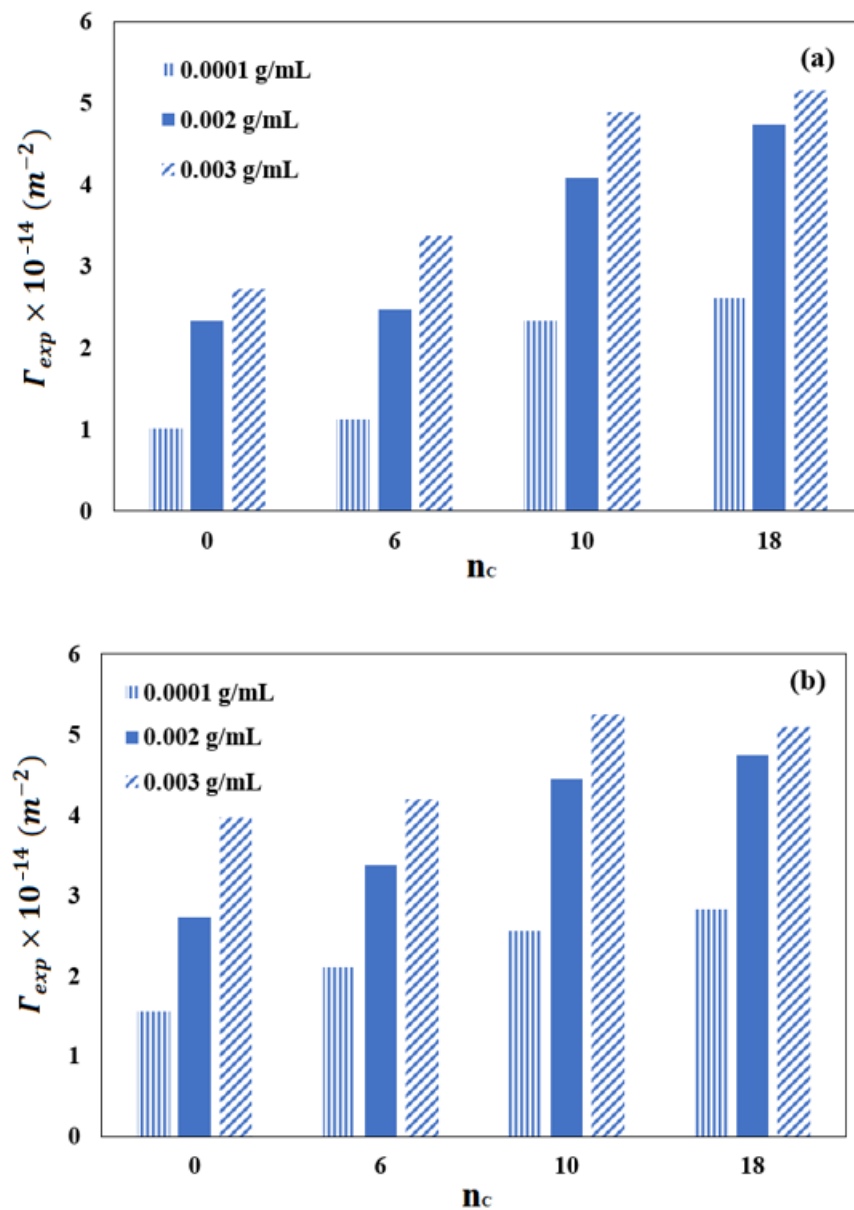

**Fig S2.** The experimental surface excess of Sclg and modified Sclgs, in terms of number of polymer chains per unit area ( $\text{m}^{-2}$ ), at different initial polymer concentrations in brine solutions on the carbonate surface (0.04% w/v) at (a) 25 °C and (b) 90 °C.

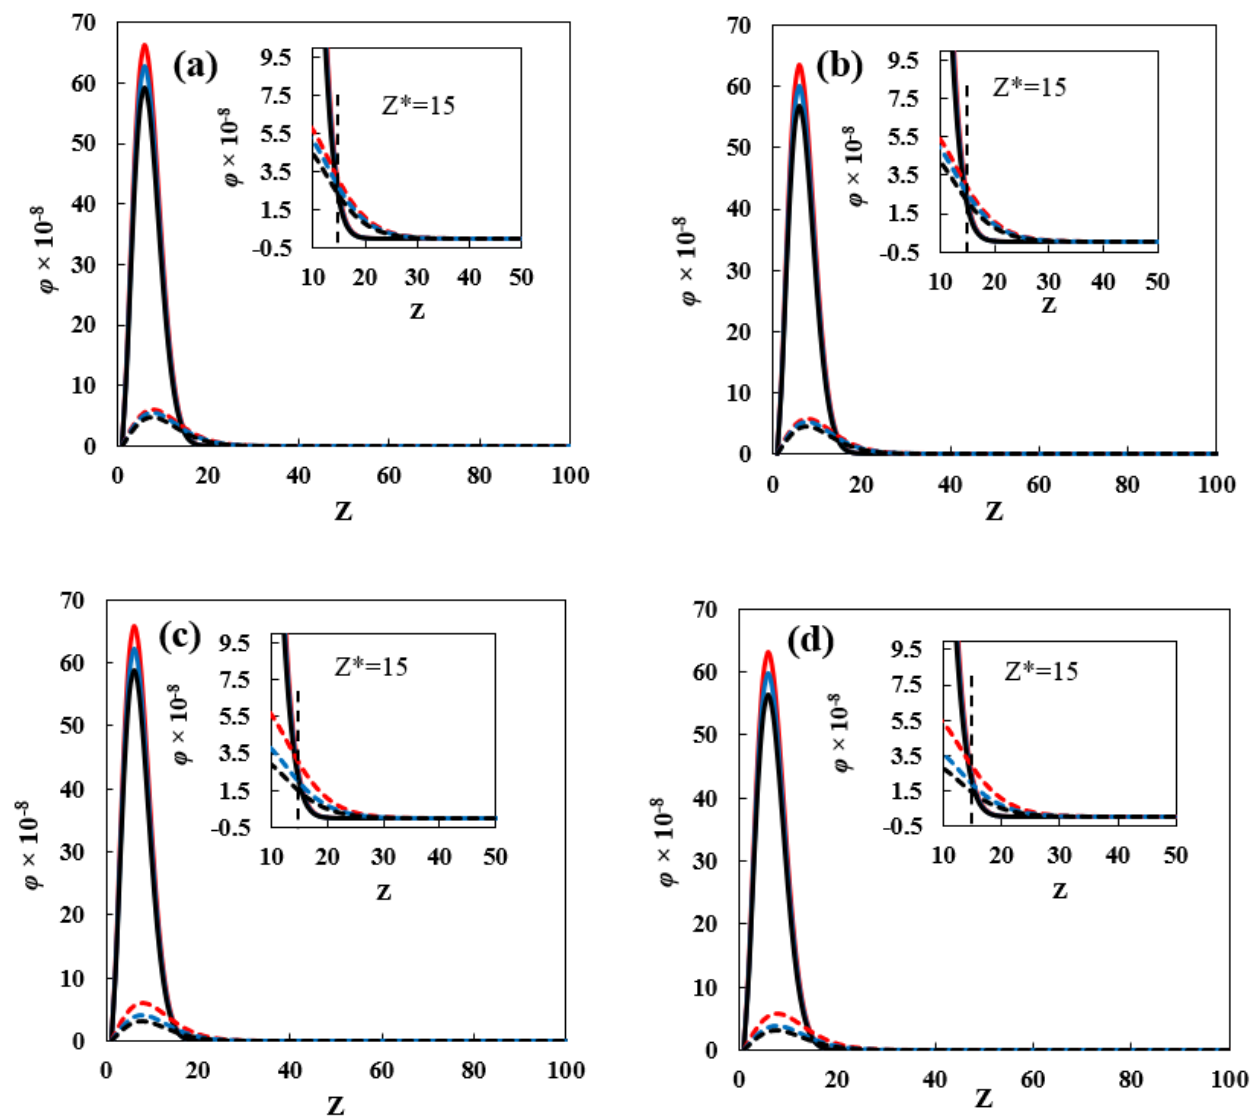

**Fig S3.** The volume fraction profiles of main chain segments in loop (solid lines) and tail (dashed lines) conformations, with length  $t = 1000$ , for Hex-ScIlg (red), Dec-ScIlg (blue)

and St-ScIlg (black) in aqueous solutions (a, b) and brine solutions (c, d), at 25 °C (a, c) and 90 °C (b, d). All the parameters for calculations are given in Tables 1 and 2.

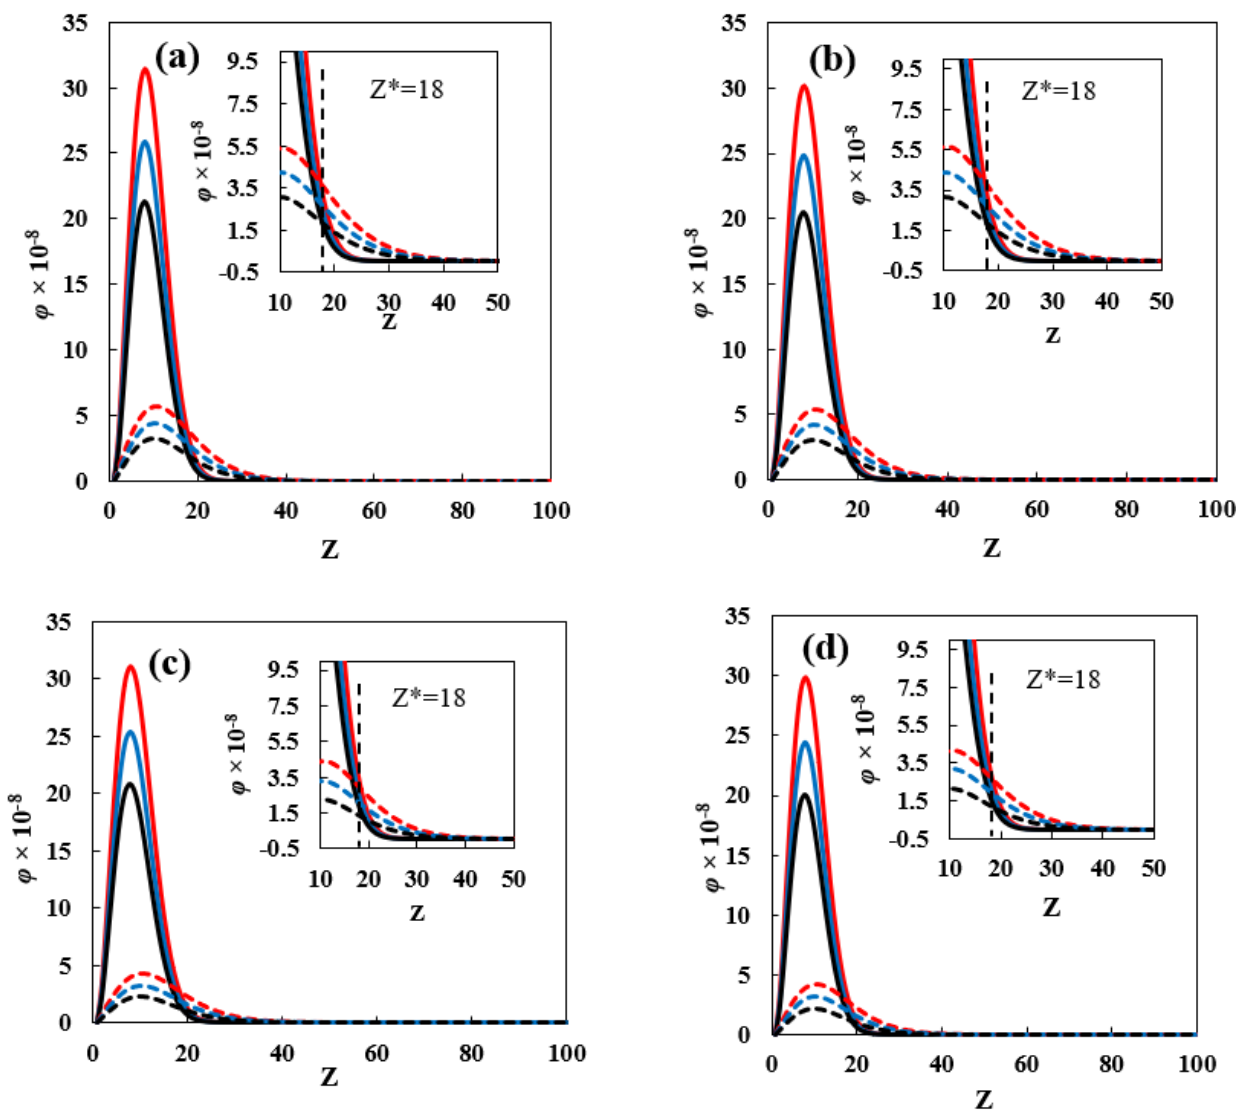

**Fig S4.** The volume fraction profiles of main chain segments in loop (solid lines) and tail (dashed lines) conformations, with length  $t = 2000$ , for Hex-ScIlg (red), Dec-ScIlg (blue)

and St-ScIlg (black) in aqueous solutions (a, b) and brine solutions (c, d), at 25 °C (a, c) and 90 °C (b, d). All the parameters for calculations are given in Tables 1 and 2.

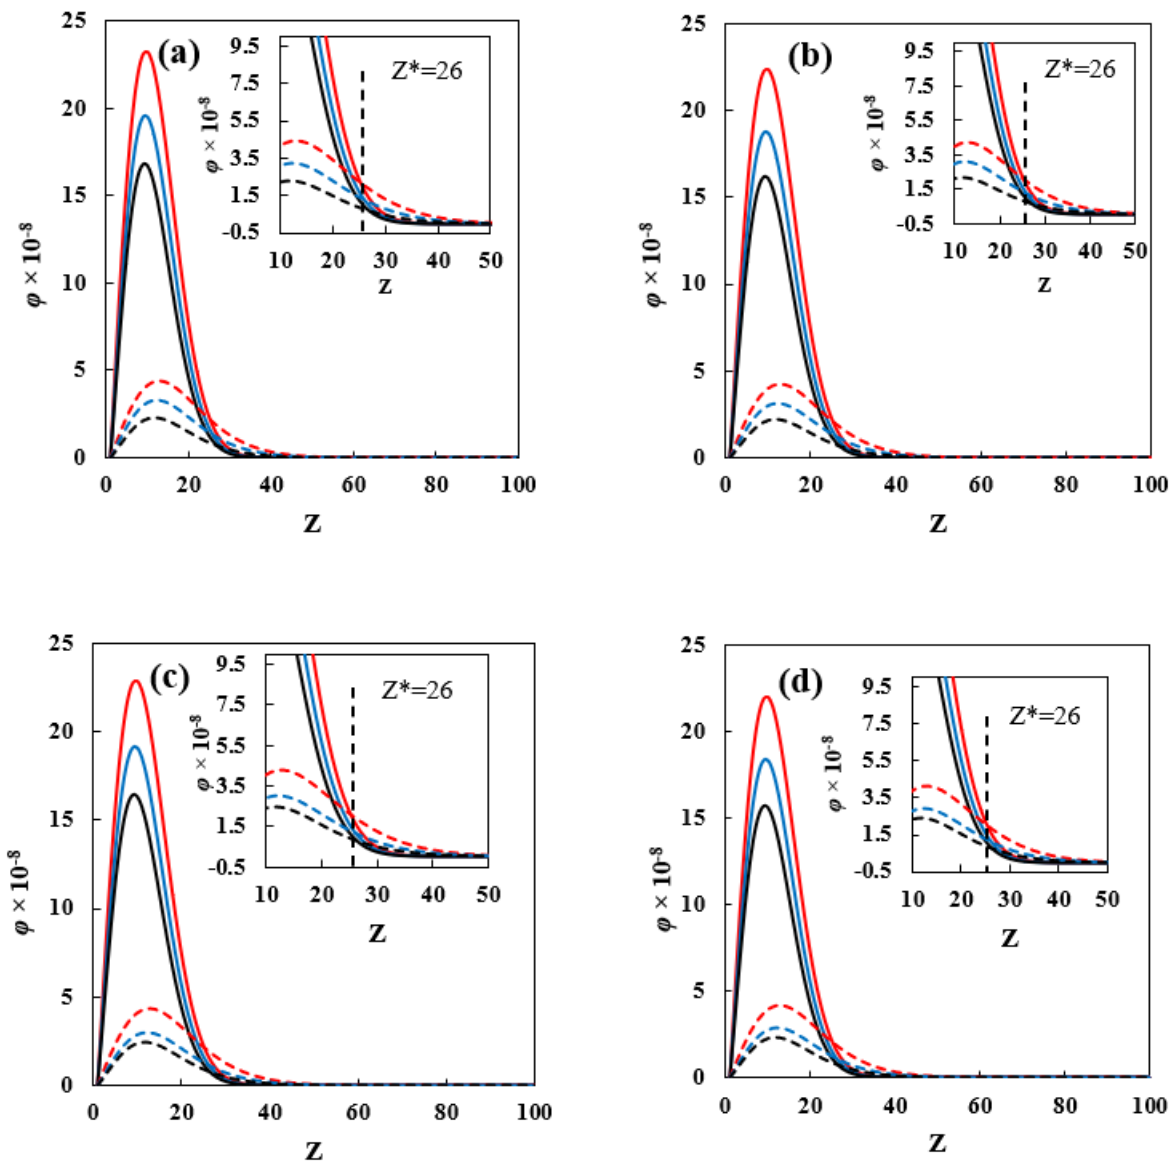

**Fig S5.** The volume fraction profiles of main chain segments in loop (solid lines) and tail (dashed lines) conformations, with length  $t = 3000$ , for Hex-ScIlg (red), Dec-ScIlg (blue) and St-ScIlg (black) in aqueous solutions (a, b) and brine solutions (c, d), at 25 °C (a, c) and 90 °C (b, d). All the parameters for calculations are given in Tables 1 and 2.

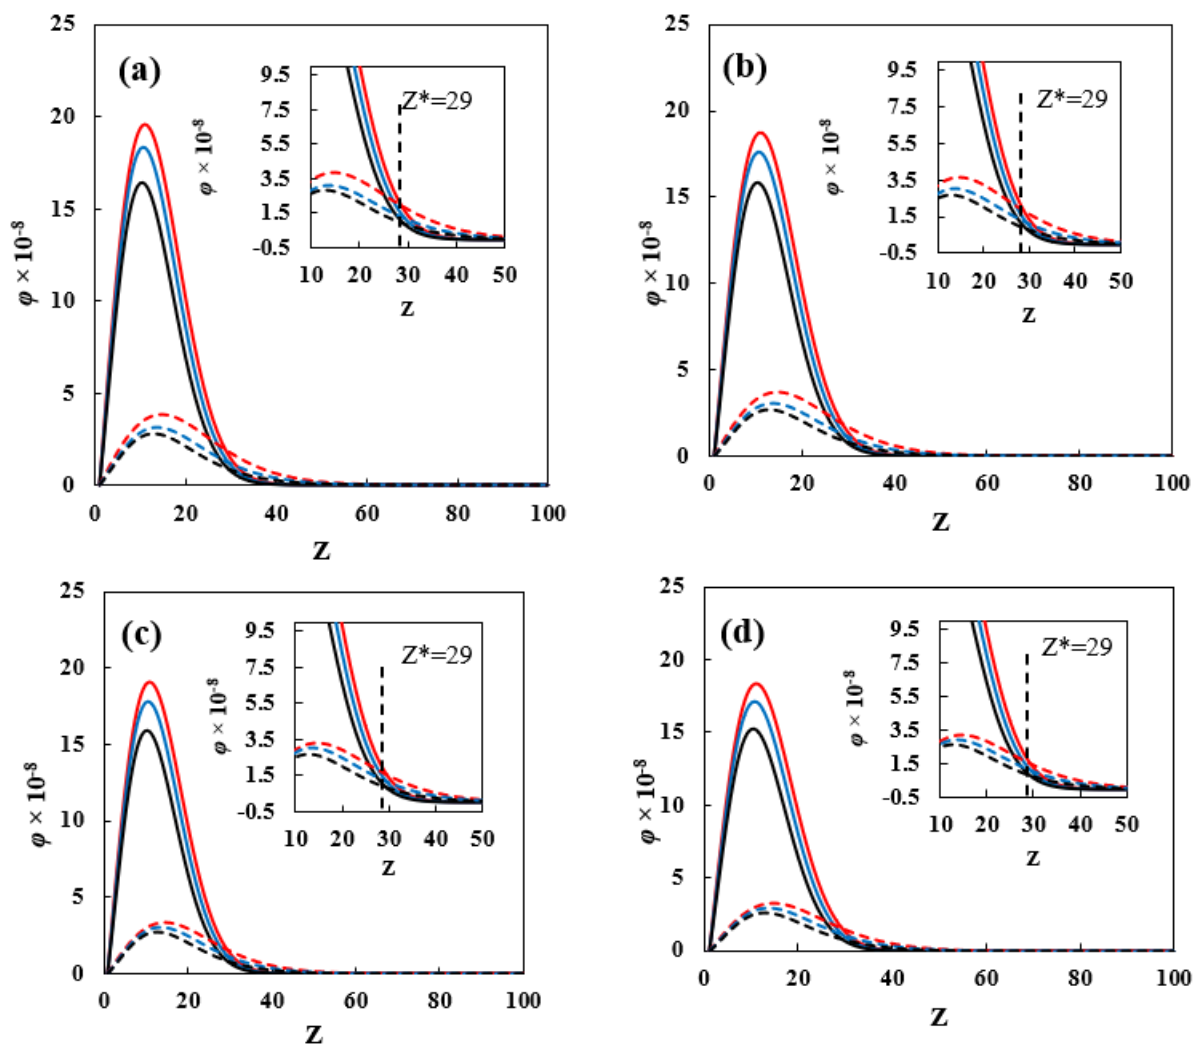

**Fig S6.** The volume fraction profiles of main chain segments in loop (solid lines) and tail (dashed lines) conformations, with length  $t = 4000$ , for Hex-ScIlg (red), Dec-ScIlg (blue) and St-ScIlg (black) in aqueous solutions (a, b) and brine solutions (c, d), at 25 °C (a, c) and 90 °C (b, d). All the parameters for calculations are given in Tables 1 and 2.

## Reference

- (1) C. M. Hansen, *Hansen Solubility Parameters A User's Handbook*; CRC Press, 2007.
